# Supplementary material
Source: publisher figshare collection journal article supplement (https://frontiersin.figshare.com/ndownloader/files/22232289)
Supplement: Supplementary file [file 22232289]

**Supplementary Table 2** – Number of species sampled for BAMM analysis and percentage relative to the total number of species reported for tribes Tulbaghieae, Gilliesieae (divided in subtribes Leucocoryninae and Gilliesiinae) and Allieae (divided in the three *Allium* evolutionary lineages)

| <b>Taxa</b>                            | <b>Number of<br/>sampled species in<br/>BAMM analysis</b> | <b>% of sampled<br/>species for BAMM<br/>analysis</b> |
|----------------------------------------|-----------------------------------------------------------|-------------------------------------------------------|
| Allieae                                |                                                           |                                                       |
| <i>Allium</i> 1st evolutionary lineage | 23                                                        | 16%                                                   |
| <i>Allium</i> 2nd evolutionary lineage | 55                                                        | 30%                                                   |
| <i>Allium</i> 3rd evolutionary lineage | 73                                                        | 14%                                                   |
| Gilliesieae                            |                                                           |                                                       |
| Gilliesiinae                           | 6                                                         | 27%                                                   |
| Leucocoryninae                         | 30                                                        | 45%                                                   |
| Tulbaghieae                            | 3                                                         | 14%                                                   |
